# Supplementary material for: The E2.65A mutation disrupts dynamic binding poses of SB269652 at the dopamine D2 and D3 receptors
Source: PubMed Central journal article supplement (PMC5786319; doi:10.1371/journal.pcbi.1005948), 2018-01-16
Supplement: pcbi.1005948.s001.pdf [file pcbi.1005948.s001.pdf]

**S1 Fig. Chemical structure of SB269652 and the input features for MSM analysis.**

The tetrahydroisoquinoline (PP) and indole-2-carboxamide moiety (SP) of SB269652 are shown in green and pink respectively. COM5 and COM6 refer to the centers of mass of the 5- and 6-member rings of the SP, respectively. The input features for MSM analysis include 12 distances from the nitrogen atoms of SB269652 to the indicated receptor C $\beta$  atoms, 2 intramolecular distances of SB269652, and the projections of the vectors from COM5 or COM6 to N4 along the axis perpendicular to membrane (see Methods).

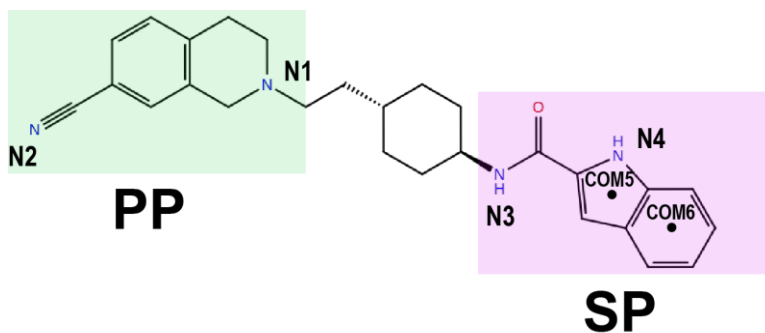

| Index | Atom name                     | SB269652 atom |
|-------|-------------------------------|---------------|
| 1     | Asp <sup>3.32</sup> C $\beta$ | N1            |
| 2     | Trp <sup>7.39</sup> C $\beta$ | N1            |
| 3     | Leu <sup>3.33</sup> C $\beta$ | N2            |
| 4     | Phe <sup>5.38</sup> C $\beta$ | N2            |
| 5     | Val <sup>5.39</sup> C $\beta$ | N2            |
| 6     | Ser <sup>5.42</sup> C $\beta$ | N2            |
| 7     | Ser <sup>5.43</sup> C $\beta$ | N2            |
| 8     | Ser <sup>5.46</sup> C $\beta$ | N2            |
| 9     | Val <sup>2.61</sup> C $\beta$ | N3            |
| 10    | Leu <sup>2.64</sup> C $\beta$ | N3            |
| 11    | Ser <sup>7.36</sup> C $\beta$ | N3            |
| 12    | Leu <sup>2.64</sup> C $\beta$ | N4            |
| 13    | SB269652 N4                   | N3            |
| 14    | SB269652 N4                   | O             |
| 15    | SB269652 N4                   | COM5          |
| 16    | SB269652 N4                   | COM6          |
