# Supplementary material for: The E2.65A mutation disrupts dynamic binding poses of SB269652 at the dopamine D2 and D3 receptors
Source: PubMed Central journal article supplement (PMC5786319; doi:10.1371/journal.pcbi.1005948), 2018-01-16

**S2 Fig. The salt bridge between the N1 atom of SB269652 and Asp<sup>3.32</sup> remains stable in all conditions.** Distributions of the minimum distances between the N1 nitrogen atom of SB269652 and carboxyl oxygen atoms of Asp<sup>3.32</sup> for each MS of the indicated conditions are shown. The MSs for each condition are colored according to Fig 1.

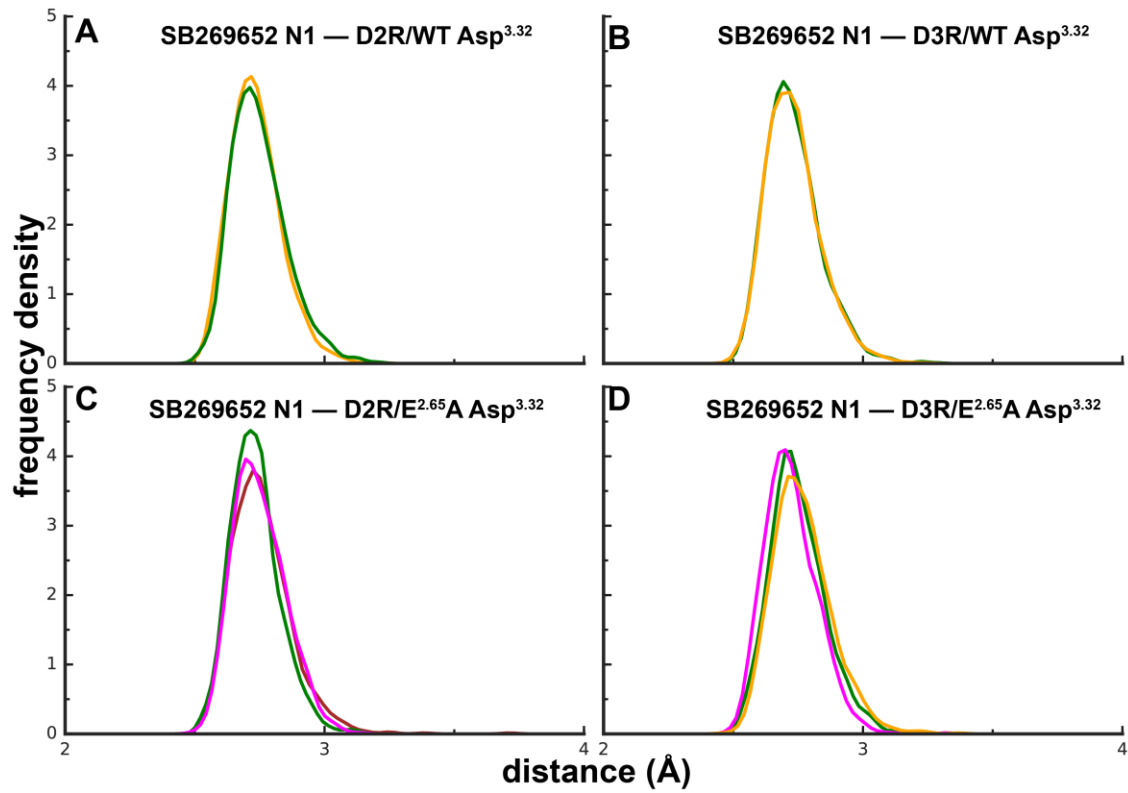

Supplement: pcbi.1005948.s002.pdf [file pcbi.1005948.s002.pdf]
