# Supplementary material for: The E2.65A mutation disrupts dynamic binding poses of SB269652 at the dopamine D2 and D3 receptors
Source: PubMed Central journal article supplement (PMC5786319; doi:10.1371/journal.pcbi.1005948), 2018-01-16

**S3 Fig. Distribution of the distances from the N3 and N4 atoms of SB269652 to the C $\beta$  atom of Ala<sup>2.65</sup> in mutant receptors. The MSs for each condition are colored according to Fig 1.**

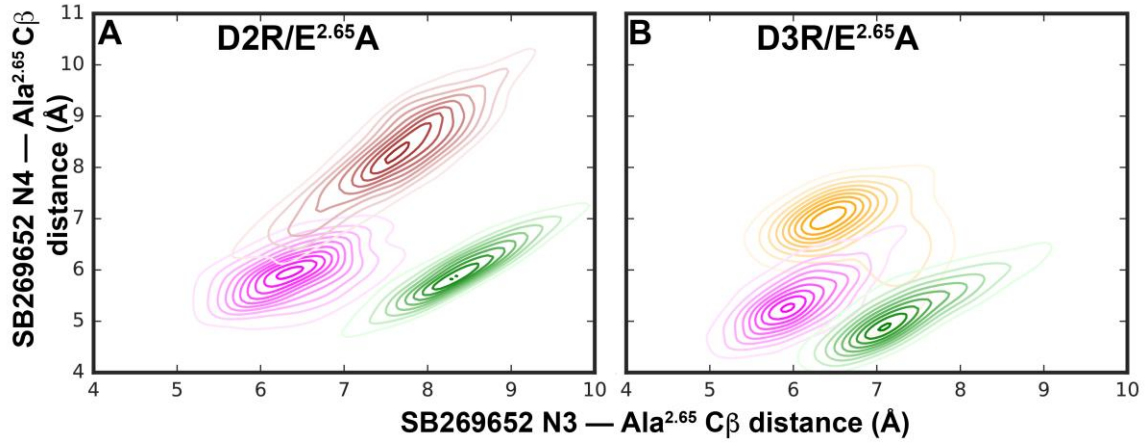

Supplement: pcbi.1005948.s003.pdf [file pcbi.1005948.s003.pdf]
