# Supplementary material for: The E2.65A mutation disrupts dynamic binding poses of SB269652 at the dopamine D2 and D3 receptors
Source: PubMed Central journal article supplement (PMC5786319; doi:10.1371/journal.pcbi.1005948), 2018-01-16
Supplement: pcbi.1005948.s004.pdf [file pcbi.1005948.s004.pdf]

**S4 Fig. Distribution of secondary structure content for each of the N terminal residues.** The secondary structures were classified by DSSP v2.0.4 [1]. The boundary between NT and TM1 is indicated by the dotted line.

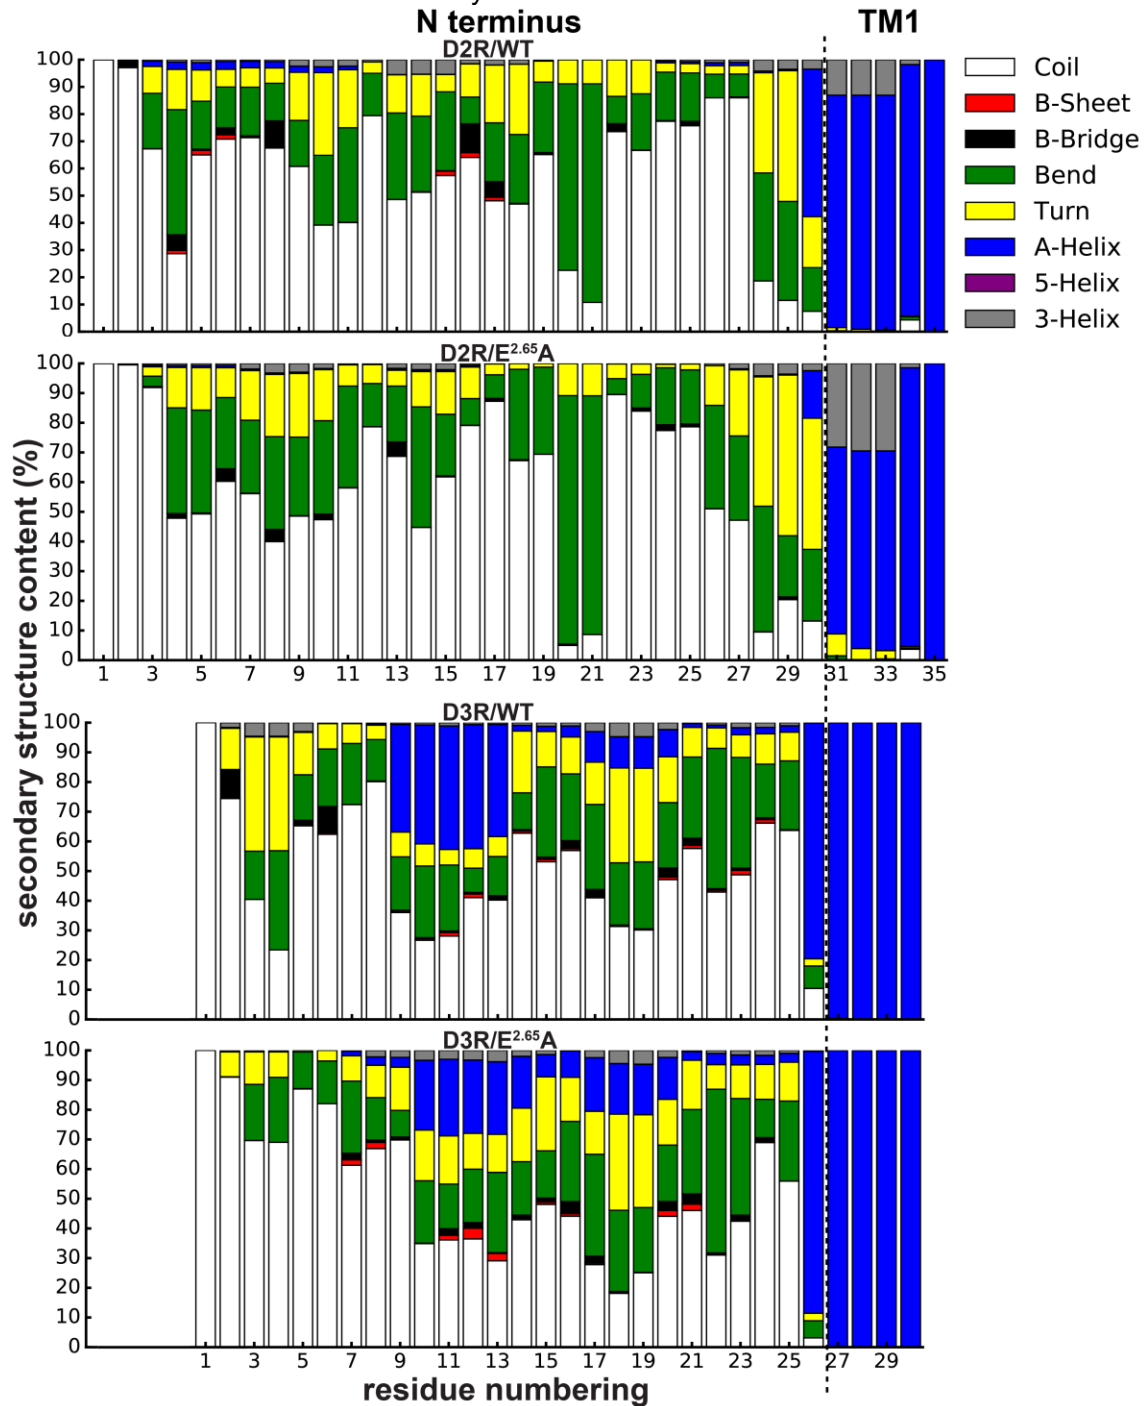

#### Reference

1. Kabsch W, Sander C. Dictionary of protein secondary structure: pattern recognition of hydrogen-bonded and geometrical features. *Biopolymers*. 1983;22(12):2577-637. doi: 10.1002/bip.360221211. PubMed PMID: 6667333.
