# Supplementary material for: The E2.65A mutation disrupts dynamic binding poses of SB269652 at the dopamine D2 and D3 receptors
Source: PubMed Central journal article supplement (PMC5786319; doi:10.1371/journal.pcbi.1005948), 2018-01-16

**S6 Fig. Implied time scales for 50- and 75-microstate MSMs.** Implied timescales (ITS) are plotted against lag time. The ITS of the maximum likelihood Bayesian Markov model are shown in solid lines, whereas the means and the 95% confidence intervals (computed by Bayesian sampling) are shown in dashed and shaded areas, respectively. In blue, red, and green, ... are the 1<sup>st</sup>, 2<sup>nd</sup>, and 3<sup>rd</sup>, ... slowest ITS.

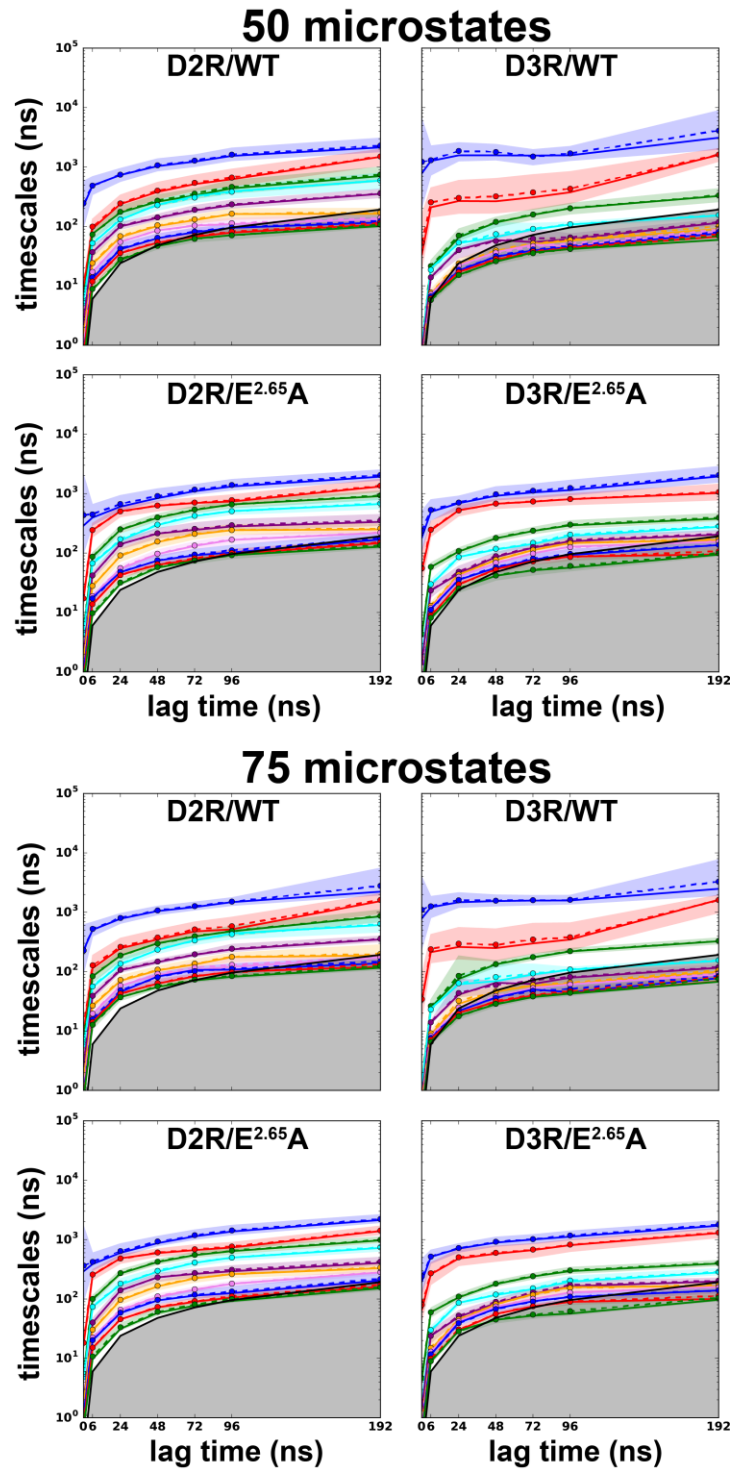

Supplement: pcbi.1005948.s006.pdf [file pcbi.1005948.s006.pdf]
