# Supplementary material for: The E2.65A mutation disrupts dynamic binding poses of SB269652 at the dopamine D2 and D3 receptors
Source: PubMed Central journal article supplement (PMC5786319; doi:10.1371/journal.pcbi.1005948), 2018-01-16

S7 Fig. ITS for 100- and 150-microstate MSMs. The color coding is the same as in S6 Fig.

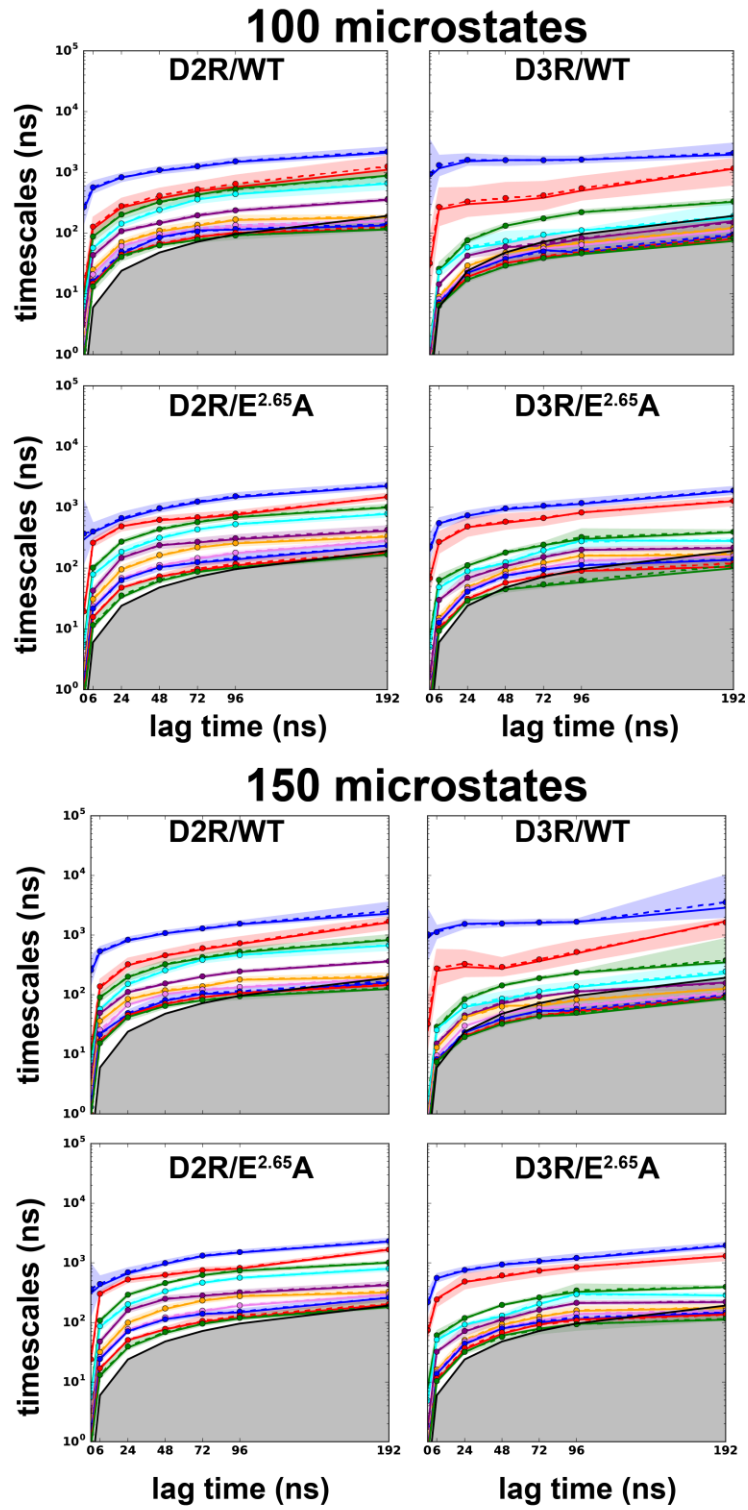

Supplement: pcbi.1005948.s007.pdf [file pcbi.1005948.s007.pdf]
