# Supplementary material for: The E2.65A mutation disrupts dynamic binding poses of SB269652 at the dopamine D2 and D3 receptors
Source: PubMed Central journal article supplement (PMC5786319; doi:10.1371/journal.pcbi.1005948), 2018-01-16

S10 Fig. Chapman-Kolmogorov test for D3R/WT and D3R/E<sup>2.65</sup>A. See S9 Fig for details.

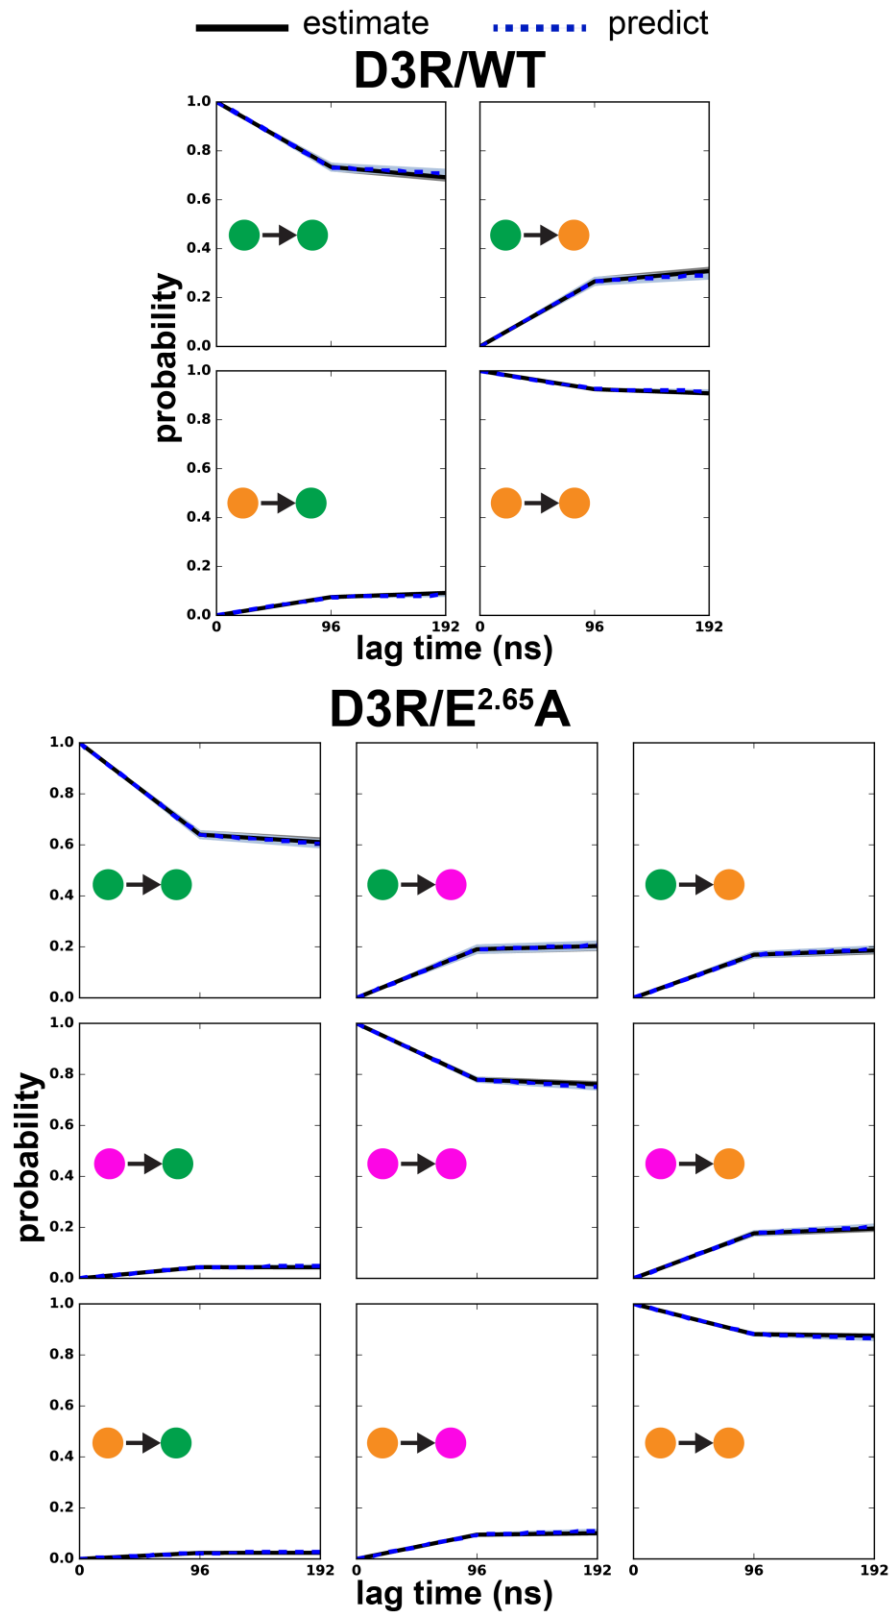

Supplement: pcbi.1005948.s010.pdf [file pcbi.1005948.s010.pdf]
