# Supplementary material for: The E2.65A mutation disrupts dynamic binding poses of SB269652 at the dopamine D2 and D3 receptors
Source: PubMed Central journal article supplement (PMC5786319; doi:10.1371/journal.pcbi.1005948), 2018-01-16
Supplement: pcbi.1005948.s011.pdf [file pcbi.1005948.s011.pdf]

**S1 Table. SB269652 interacting residues.** The means and standard deviations of the interaction frequencies for each residue were calculated using 3 sets of 500 MSM Bayesian samples, each set containing 1500 frames per MS. Residues having contact frequencies above 25% in at least one of the MS are listed and the contact frequencies above 25% are in bold. The OBS and SBP residues identified in [7] are highlighted in cyan and yellow, respectively.

| Index  | D2R/WT       |                   |                   | D3R/WT       |                   |                   |
|--------|--------------|-------------------|-------------------|--------------|-------------------|-------------------|
|        | Residue      | green (%)         | orange (%)        | Residue      | green (%)         | orange (%)        |
| NT     | <b>MET1</b>  | <b>39.3 ± 1.0</b> | <b>25.7 ± 1.7</b> | <b>LEU7</b>  | <b>60.7 ± 0.9</b> | <b>51.9 ± 0.8</b> |
|        | <b>TRP18</b> | <b>25.0 ± 1.6</b> | <b>11.4 ± 0.7</b> | <b>LEU11</b> | <b>38.2 ± 2.3</b> | <b>31.5 ± 1.3</b> |
|        | <b>PHE22</b> | <b>33.9 ± 0.6</b> | <b>23.5 ± 1.3</b> | <b>TYR13</b> | <b>21.4 ± 0.6</b> | <b>32.7 ± 1.9</b> |
|        | <b>ASN23</b> | <b>25.2 ± 0.8</b> | <b>20.0 ± 0.4</b> |              |                   |                   |
| 1.32   | TYR34        | 28.6 ± 0.2        | 6.6 ± 0.8         | HIS29        | 29.5 ± 2.1        | 45.5 ± 1.4        |
| 2.61   | VAL91        | 93.1 ± 0.2        | 84.2 ± 0.7        | VAL86        | 94.9 ± 0.8        | 93.9 ± 1.3        |
| 2.64   | LEU94        | 96.2 ± 0.3        | 87.8 ± 0.8        | LEU89        | 100.0 ± 0.1       | 99.8 ± 0.1        |
| 2.65   | GLU95        | 94.7 ± 0.2        | 91.4 ± 0.5        | GLU90        | 99.5 ± 0.2        | 98.6 ± 0.2        |
| EL1    | GLY98        | 93.8 ± 0.4        | 76.2 ± 1.6        | GLY93        | 99.4 ± 0.1        | 99.1 ± 0.3        |
| EL1    | GLU99        | 54.6 ± 0.7        | 39.5 ± 0.9        | GLY94        | 99.4 ± 0.0        | 98.8 ± 0.3        |
| 3.28   | PHE110       | 88.9 ± 0.6        | 80.4 ± 1.3        | PHE106       | 77.0 ± 0.8        | 82.5 ± 0.8        |
| 3.32   | ASP114       | 100.0 ± 0.0       | 100.0 ± 0.0       | ASP110       | 100.0 ± 0.0       | 100.0 ± 0.0       |
| 3.33   | VAL115       | 99.9 ± 0.1        | 100.0 ± 0.1       | VAL111       | 99.9 ± 0.2        | 99.7 ± 0.1        |
| 3.36   | CYS118       | 95.8 ± 0.2        | 99.0 ± 0.3        | CYS114       | 83.4 ± 1.9        | 90.6 ± 0.8        |
| EL2.50 | CYS182       | 27.9 ± 0.2        | 9.0 ± 0.2         | CYS181       | 33.3 ± 0.8        | 52.1 ± 0.5        |
| EL2.51 | ILE183       | 97.2 ± 0.3        | 99.7 ± 0.2        | SER182       | 77.0 ± 0.6        | 72.7 ± 0.9        |
| EL2.52 | ILE184       | 27.5 ± 0.5        | 0.6 ± 0.1         | ILE183       | 97.0 ± 0.4        | 96.0 ± 0.7        |
| 5.38   | PHE189       | 11.0 ± 0.4        | 4.9 ± 0.5         | PHE188       | 96.2 ± 0.6        | 95.8 ± 0.4        |
| 5.39   | VAL190       | 93.5 ± 0.9        | 96.6 ± 0.4        | VAL189       | 99.6 ± 0.1        | 99.6 ± 0.1        |
| 5.42   | SER193       | 92.9 ± 0.3        | 99.8 ± 0.1        | SER192       | 100.0 ± 0.1       | 99.9 ± 0.1        |
| 5.43   | SER194       | 88.3 ± 0.3        | 99.7 ± 0.1        | SER193       | 14.1 ± 1.0        | 14.0 ± 0.5        |
| 5.46   | SER197       | 82.4 ± 0.9        | 97.5 ± 0.4        | SER196       | 15.6 ± 2.1        | 17.6 ± 0.9        |
| 6.48   | TRP357       | 100.0 ± 0.0       | 100.0 ± 0.0       | TRP342       | 99.8 ± 0.2        | 99.8 ± 0.1        |
| 6.51   | PHE360       | 100.0 ± 0.0       | 100.0 ± 0.0       | PHE345       | 100.0 ± 0.0       | 100.0 ± 0.0       |
| 6.52   | PHE361       | 99.8 ± 0.1        | 99.8 ± 0.2        | PHE346       | 94.3 ± 0.9        | 95.1 ± 0.5        |
| 6.55   | HIS364       | 80.4 ± 0.8        | 94.3 ± 0.3        | HIS349       | 62.6 ± 1.5        | 43.0 ± 1.5        |
| 7.32   | PRO376       | 3.9 ± 0.4         | 16.9 ± 0.7        | PRO362       | 46.3 ± 0.7        | 74.2 ± 0.3        |
| 7.33   | VAL377       | 3.0 ± 0.4         | 14.4 ± 0.6        | GLU363       | 28.3 ± 0.5        | 46.2 ± 1.3        |
| 7.35   | TYR379       | 29.4 ± 0.8        | 33.7 ± 0.8        | TYR365       | 95.3 ± 0.3        | 97.0 ± 0.6        |
| 7.36   | SER380       | 5.6 ± 0.5         | 21.7 ± 0.4        | SER366       | 60.8 ± 0.6        | 81.7 ± 1.4        |
| 7.39   | THR383       | 99.6 ± 0.1        | 100.0 ± 0.1       | THR369       | 100.0 ± 0.0       | 100.0 ± 0.0       |
| 7.43   | TYR387       | 99.7 ± 0.1        | 99.9 ± 0.1        | TYR373       | 98.1 ± 0.4        | 97.1 ± 0.2        |
