# Supplementary material for: The E2.65A mutation disrupts dynamic binding poses of SB269652 at the dopamine D2 and D3 receptors
Source: PubMed Central journal article supplement (PMC5786319; doi:10.1371/journal.pcbi.1005948), 2018-01-16
Supplement: pcbi.1005948.s012.pdf [file pcbi.1005948.s012.pdf]

**S2 Table. Definition of helical subsegments.** Ballesteros-Weinstein numbering for the subsegments is given in parenthesis.

| <b>Subsegments</b>        | <b>D2R</b> | <b>D3R</b> |
|---------------------------|------------|------------|
| <b>NT</b>                 | 1 - 30     | 1 - 26     |
| <b>TM1e (1.29 - 1.36)</b> | 31 - 38    | 27 - 33    |
| <b>TM1m (1.37 - 1.45)</b> | 39 - 47    | 34 - 42    |
| <b>TM1i (1.46 - 1.60)</b> | 48 - 62    | 43 - 57    |
| <b>IL1</b>                | 63 - 67    | 58 - 62    |
| <b>TM2e (2.62 - 2.66)</b> | 92 - 96    | 87 - 91    |
| <b>TM2m (2.52 - 2.61)</b> | 82 - 91    | 77 - 86    |
| <b>TM2i (2.38 - 2.51)</b> | 68 - 81    | 63 - 76    |
| <b>EL1</b>                | 97 - 103   | 92 - 99    |
| <b>TM3e (3.22 - 3.31)</b> | 104 - 113  | 100 - 109  |
| <b>TM3m (3.32 - 3.38)</b> | 114 - 120  | 110 - 116  |
| <b>TM3i (3.39 - 3.56)</b> | 121 - 138  | 117 - 134  |
| <b>IL2</b>                | 139 - 146  | 135 - 144  |
| <b>TM4e (4.56 - 4.62)</b> | 166 - 172  | 164 - 170  |
| <b>TM4m (4.50 - 4.55)</b> | 160 - 165  | 158 - 163  |
| <b>TM4i (4.37 - 4.49)</b> | 147 - 159  | 145 - 157  |
| <b>EL2</b>                | 173 - 186  | 171 - 185  |
| <b>TM5e (5.36 - 5.44)</b> | 187 - 195  | 186 - 194  |
| <b>TM5m (5.45 - 5.52)</b> | 196 - 203  | 195 - 202  |
| <b>TM5i (5.53 - 5.68)</b> | 204 - 219  | 203 - 218  |
| <b>IL3</b>                | 220 - 336  | 219 - 321  |
| <b>TM6e (6.55 - 6.60)</b> | 364 - 369  | 349 - 354  |
| <b>TM6m (6.47 - 6.54)</b> | 356 - 363  | 341 - 348  |
| <b>TM6i (6.28 - 6.46)</b> | 337 - 355  | 322 - 340  |
| <b>EL3</b>                | 370 - 375  | 355 - 361  |
| <b>TM7e (7.32 - 7.38)</b> | 376 - 382  | 362 - 368  |
| <b>TM7m (7.39 - 7.46)</b> | 383 - 390  | 369 - 376  |
| <b>TM7i (7.47 - 7.55)</b> | 391 - 399  | 377 - 385  |
| <b>H8</b>                 | 400 - 414  | 386 - 400  |
